# Supplementary material
Source: MDPI journal article supplement (https://www.mdpi.com/2073-4441/9/12/985)
Supplement: s1 [file s1]

|  |
| --- |

**SUPPLEMENTARY INFORMATION**

**Physico-geographical parameters of rivers, results of statistical treatment, latitudinal pattern of nutrient concentrations for rivers of different size and impact of permafrost on nutrient concentration in rivers.**

Full dataset of measured parameters is available at the Research gate : Pokrovsky, O. Nutrient concentrations in western Siberian rivers in June and August 2015 (< 0.45 µm), 2017,

DOI: 10.13140/RG.2.2.19454.08005.

**Table S1.** The physico-geographical characteristics of the catchments as determined by digitalizing available soil, vegetation, lithology and geocryology maps.

**Table S2.** Correlation matrix of component concentrations in permafrost-free and permafrost-bearing watersheds during both seasons.

**Permafrost-free rivers.** Marked Pearson correlations R > 0.60 are significant at p < 0.05 (N=19)

|  | **PO4** | **Ptot** | **NO3** | **NH4** | **POC** | **DOC** | **DIC** | **Si** | **K** | **Ca** | **Mn** | **Fe** |
| --- | --- | --- | --- | --- | --- | --- | --- | --- | --- | --- | --- | --- |
| **pH** | 0.42 | 0.43 | 0.58 | 0.51 | **0.74** | -0.57 | **0.72** | **0.67** | 0.41 | **0.77** | 0.50 | -0.04 |
| **PO4** | **1.00** | **0.84** | **0.64** | **0.63** | 0.31 | 0.16 | 0.56 | 0.12 | **0.63** | **0.75** | 0.50 | -0.13 |
| **Ptot** | **0.84** | **1.00** | 0.53 | 0.53 | 0.46 | -0.07 | **0.62** | 0.02 | **0.65** | **0.78** | **0.69** | -0.02 |
| **NO3** | **0.64** | 0.53 | **1.00** | **0.94** | **0.61** | -0.10 | **0.85** | 0.54 | 0.20 | **0.80** | 0.62 | -0.34 |
| **NH4** | **0.63** | 0.53 | **0.94** | **1.00** | **0.66** | 0.06 | **0.78** | **0.63** | 0.07 | **0.70** | **0.66** | -0.39 |
| **POC** | 0.31 | 0.46 | 0.61 | **0.66** | **1.00** | -0.30 | **0.79** | **0.75** | -0.01 | **0.71** | **0.87** | -0.13 |
| **DOC** | 0.16 | -0.07 | -0.10 | 0.06 | -0.30 | **1.00** | -0.22 | -0.15 | -0.32 | -0.34 | -0.08 | -0.45 |
| **DIC** | 0.56 | **0.62** | **0.85** | **0.78** | **0.79** | -0.22 | **1.00** | 0.56 | 0.27 | **0.92** | **0.86** | -0.48 |
| **Si** | 0.12 | 0.02 | 0.54 | **0.63** | **0.75** | -0.15 | 0.56 | **1.00** | -0.14 | 0.44 | 0.43 | -0.29 |
| **K** | **0.63** | **0.65** | 0.20 | 0.07 | -0.01 | -0.32 | 0.27 | -0.14 | **1.00** | 0.53 | 0.14 | 0.21 |
| **Ca** | **0.75** | **0.78** | **0.80** | **0.70** | **0.71** | -0.34 | **0.92** | 0.44 | 0.53 | **1.00** | **0.79** | -0.19 |
| **Mn** | 0.50 | **0.69** | 0.62 | **0.66** | **0.87** | -0.08 | **0.86** | 0.43 | 0.14 | **0.79** | **1.00** | -0.43 |
| **Fe** | -0.13 | -0.02 | -0.34 | -0.39 | -0.13 | -0.45 | -0.48 | -0.29 | 0.21 | -0.19 | -0.43 | **1.00** |

**Permafrost-bearing rivers.** Marked Pearson correlations R > 0.40 are significant at p < 0.05 (N=55)

|  | **PO4** | **Ptot** | **NO3** | **NH4** | **POC** | **DOC** | **DIC** | **Si** | **K** | **Ca** | **Mn** | **Fe** |
| --- | --- | --- | --- | --- | --- | --- | --- | --- | --- | --- | --- | --- |
| **pH** | **0.45** | **0.50** | **0.41** | -0.05 | 0.09 | -0.21 | **0.67** | **0.63** | 0.19 | **0.66** | 0.18 | 0.12 |
| **PO4** | **1.00** | **0.68** | 0.37 | 0.07 | -0.07 | -0.02 | **0.45** | 0.39 | **0.40** | **0.40** | 0.12 | 0.06 |
| **Ptot** | **0.68** | **1.00** | 0.27 | 0.03 | 0.06 | 0.09 | **0.48** | **0.48** | **0.42** | **0.50** | **0.45** | 0.33 |
| **NO3** | 0.37 | 0.27 | **1.00** | **0.51** | 0.26 | 0.01 | 0.19 | 0.14 | -0.07 | 0.24 | -0.21 | -0.17 |
| **NH4** | 0.07 | 0.03 | **0.51** | **1.00** | **0.45** | 0.21 | 0.04 | 0.05 | -0.24 | 0.04 | 0.17 | -0.09 |
| **POC** | -0.07 | 0.06 | 0.26 | **0.45** | **1.00** | **0.42** | 0.06 | 0.16 | -0.09 | 0.16 | 0.16 | -0.08 |
| **DOC** | -0.02 | 0.09 | 0.01 | 0.21 | **0.42** | **1.00** | -0.15 | -0.01 | 0.27 | 0.20 | 0.09 | 0.38 |
| **DIC** | **0.45** | **0.48** | 0.19 | 0.04 | 0.06 | -0.15 | **1.00** | **0.71** | 0.29 | **0.84** | 0.38 | -0.02 |
| **Si** | 0.39 | **0.48** | 0.14 | 0.05 | 0.16 | -0.01 | **0.71** | **1.00** | 0.26 | **0.63** | **0.59** | 0.20 |
| **K** | **0.40** | **0.42** | -0.07 | -0.24 | -0.09 | 0.27 | 0.29 | 0.26 | **1.00** | **0.53** | 0.19 | **0.36** |
| **Ca** | **0.40** | **0.50** | 0.24 | 0.04 | 0.16 | 0.20 | **0.84** | **0.63** | **0.53** | **1.00** | 0.29 | 0.22 |
| **Mn** | 0.12 | **0.45** | -0.21 | 0.17 | 0.16 | 0.09 | 0.38 | **0.59** | 0.19 | 0.29 | **1.00** | **0.44** |
| **Fe** | 0.06 | 0.33 | -0.17 | -0.09 | -0.08 | 0.38 | -0.02 | 0.20 | 0.36 | 0.22 | **0.44** | **1.00** |

**Table S3.** Correlations matrix of landscape parameters and solute concentrations in permafrost-free and permafrost-bearing watersheds during both seasons.

**Permafrost-free watersheds.** Marked Pearson correlations R > 0.61 are significant at p < 0.05 (N = 19).

|  | **Latit** | **Swatershed** | **runoff** | **bogs** | **forest** | **lakes** | **Triver** | **Twatershed** |
| --- | --- | --- | --- | --- | --- | --- | --- | --- |
| **pH** | 0.25 | 0.47 | 0.43 | -0.62 | 0.58 | -0.16 | -0.48 | -0.37 |
| **PO4** | **-0.67** | 0.53 | -0.54 | -0.38 | 0.45 | -0.49 | 0.34 | 0.57 |
| **Ptot** | **-0.66** | 0.38 | -0.47 | -0.14 | 0.26 | -0.57 | 0.42 | 0.57 |
| **NO3** | -0.15 | 0.54 | -0.05 | -0.60 | 0.61 | -0.38 | -0.17 | 0.05 |
| **NH4** | -0.17 | 0.27 | -0.16 | -0.39 | 0.36 | -0.15 | -0.16 | 0.07 |
| **POC** | 0.26 | 0.07 | 0.24 | -0.40 | 0.24 | 0.35 | -0.53 | -0.36 |
| **DOC** | -0.29 | -0.19 | -0.51 | 0.15 | -0.19 | 0.18 | 0.26 | 0.33 |
| **DIC** | 0.03 | 0.49 | 0.21 | -0.54 | 0.59 | -0.49 | -0.33 | -0.13 |
| **Si** | 0.54 | -0.01 | 0.47 | -0.42 | 0.24 | 0.38 | **-0.78** | **-0.64** |
| **K** | -0.52 | 0.57 | -0.25 | -0.27 | 0.39 | -0.55 | 0.30 | 0.45 |
| **Ca** | -0.18 | 0.62 | 0.05 | -0.59 | **0.66** | -0.59 | -0.12 | 0.06 |
| **Mn** | -0.05 | 0.14 | 0.05 | -0.18 | 0.25 | -0.42 | -0.13 | -0.02 |
| **Fe** | -0.17 | 0.03 | -0.15 | 0.06 | -0.08 | 0.15 | 0.39 | 0.16 |

**Permafrost-bearing watersheds.** Marked Pearson correlations R > 0.22 are significant at p < 0.05 (N = 55).

|  | **Latit** | **Swatershed** | **runoff** | **bogs** | **forest** | **lakes** | **Permafr.** | **Triver** | **Twatershed** |
| --- | --- | --- | --- | --- | --- | --- | --- | --- | --- |
| **pH** | 0.23 | **0.30** | **0.45** | **-0.42** | **0.46** | **-0.48** | -0.15 | **-0.29** | -0.19 |
| **PO4** | 0.25 | 0.19 | **0.35** | **-0.31** | **0.40** | **-0.35** | 0.13 | **-0.27** | -0.24 |
| **Ptot** | 0.16 | 0.17 | 0.21 | **-0.39** | **0.42** | **-0.31** | -0.10 | **-0.33** | -0.12 |
| **NO3** | 0.02 | 0.08 | 0.17 | 0.02 | 0.02 | 0.03 | 0.06 | -0.17 | -0.02 |
| **NH4** | -0.07 | -0.23 | **-0.38** | 0.18 | -0.13 | 0.12 | 0.10 | **-0.29** | 0.01 |
| **POC** | -0.20 | -0.06 | -0.09 | 0.12 | -0.09 | 0.07 | -0.14 | -0.17 | 0.19 |
| **DOC** | **-0.36** | 0.01 | -0.04 | 0.15 | -0.06 | -0.03 | **-0.29** | 0.05 | **0.33** |
| **DIC** | 0.16 | 0.16 | **0.28** | **-0.58** | **0.55** | **-0.51** | -0.20 | **-0.57** | -0.18 |
| **Si** | -0.02 | 0.01 | 0.13 | **-0.62** | **0.74** | **-0.69** | **-0.33** | **-0.60** | 0.02 |
| **K** | **-0.26** | **0.41** | **0.33** | **-0.32** | **0.35** | **-0.26** | **-0.35** | 0.13 | **0.29** |
| **Ca** | -0.17 | **0.34** | **0.41** | **-0.56** | **0.57** | **-0.51** | **-0.46** | **-0.31** | 0.16 |
| **Mn** | -0.07 | -0.20 | **-0.33** | **-0.46** | **0.47** | **-0.36** | **-0.31** | **-0.51** | 0.03 |
| **Fe** | -0.23 | 0.00 | -0.15 | -0.09 | 0.17 | -0.15 | **-0.28** | 0.06 | 0.22 |

**Table S4.** Mann-Whitney U test of the difference in nutrient concentration between two adjacent permafrost zones. Statistically significant (at p < 0.05) differences are in bold red.

**Continuous/Discontinuous** (« + » means continuous < discontinuous; « - » means continuous > discontinuous).

| **Variable** | **June** | | | **August** | | |
| --- | --- | --- | --- | --- | --- | --- |
| **U** | **Z** | **p-level** | **U** | **Z** | **p-level** |
| рН | 11.5 | -1.36 | 0.17 | **5** | **-2.03** | **0.042** |
| DOC, ppm | 14 | -1 | 0.32 | 6 | -1.87 | 0.062 |
| DIC, ppm | 8 | -1.8 | 0.063 | 5 | -1.57 | 0.117 |
| P-PO4, µg·L-1 | 20 | -0.14 | 0.88 | 16 | -0.24 | 0.808 |
| Ptot, ppb | 19 | 0.28 | 0.77 | 15 | -0.41 | 0.685 |
| N-NO3-, µg·L-1 | 20 | -0.14 | 0.88 | 10 | 1.22 | 0.223 |
| N-NH4+, µg·L-1 | 21 | 0 | 1 | 10 | 1.22 | 0.223 |
| POC, mg·L-1 | 12 | 1.28 | 0.198 | 12 | -0.892 | 0.372 |
| Si, ppb | 18 | -0.42 | 0.668 | 12 | -0.892 | 0.372 |
| K, ppb | 15 | 0.85 | 0.39 | 10 | -1.22 | 0.223 |
| Ca, ppb | 9 | -1.71 | 0.086 | **5** | **-2.03** | **0.042** |
| Mn, ppb | 21 | 0 | 1 | **1** | **-2.68** | **0.007** |
| Fe, ppb | 14 | 1 | 0.31 | 11 | -1.06 | 0.291 |

**Discontinuous/Sporadic** (« + » means discontinuous < sporadic; « - » means discontinuous > sporadic)

| **Variable** | **June** | | | **August** | | |
| --- | --- | --- | --- | --- | --- | --- |
| **U** | **Z** | **p-level** | **U** | **Z** | **p-level** |
| рН | 52 | -0.035 | 0.972 | 22 | -1.49 | 0.135 |
| DOC, ppm | **22** | **2.15** | **0.032** | 24 | 1.87 | 0.062 |
| DIC, ppm | 36 | 1.16 | 0.245 | 31 | 0.37 | 0.711 |
| P-PO4, µg·L-1 | 45 | -0.53 | 0.597 | 43 | -0.45 | 0.654 |
| Ptot, ppb | 51 | 0.106 | 0.916 | 45 | 0.3 | 0.765 |
| N-NO3-, µg·L-1 | 51 | 0.106 | 0.916 | **19** | **-2.24** | **0.025** |
| N-NH4+, µg·L-1 | 34 | 1.3 | 0.192 | 48 | 0.075 | 0.94 |
| POC, mg·L-1 | 34 | 1.3 | 0.192 | 23 | 1.94 | 0.052 |
| Si, ppb | 36 | 1.16 | 0.245 | 38 | 0.82 | 0.412 |
| K, ppb | 50 | -0.14 | 0.888 | 41 | 0.6 | 0.551 |
| Ca, ppb | 38 | 1.02 | 0.307 | 39 | 0.75 | 0.456 |
| Mn, ppb | **19** | **2.36** | **0.018** | 29 | 1.49 | 0.136 |
| Fe, ppb | **24** | **2.01** | **0.045** | 32 | 1.27 | 0.205 |

**Table S4, continued.**

**Sporadic/Isolated** (« + » means sporadic < isolated; « - » means sporadic > isolated)

| **Variable** | **June** | | | **August** | | |
| --- | --- | --- | --- | --- | --- | --- |
| **U** | **Z** | **p-level** | **U** | **Z** | **p-level** |
| рН | 96 | -1.41 | 0.159 | 80 | 0.85 | 0.393 |
| CН4, µmol·L-1 | **51** | **-2** | **0.046** | n.d. | n.d. | n.d. |
| CO2, µmol·L-1 | 91 | 0.12 | 0.906 | n.d. | n.d. | n.d. |
| DOC, ppm | **57** | **2.82** | **0.005** | **59** | **2.38** | **0.017** |
| DIC, ppm | 126 | -0.33 | 0.745 | 124 | 0.076 | 0.939 |
| P-PO4, µg·L-1 | 133 | 0.072 | 0.942 | 110 | -0.61 | 0.543 |
| Ptot, ppb | 112 | -0.83 | 0.406 | 99 | -1.03 | 0.305 |
| N-NO3-, µg·L-1 | 132 | -0.109 | 0.914 | **73** | **2.01** | **0.044** |
| N-NH4+, µg·L-1 | 130 | 0.18 | 0.857 | 109 | 0.65 | 0.518 |
| POC, mg·L-1 | 124 | -0.4 | 0.691 | 82 | -0.74 | 0.462 |
| Si, ppb | 90 | -1.63 | 0.104 | 89 | -1.41 | 0.16 |
| K, ppb | 103 | 1.16 | 0.247 | 104 | -0.84 | 0.403 |
| Ca, ppb | 86 | 1.77 | 0.076 | **70** | **2.13** | **0.033** |
| Mn, ppb | **77.5** | **-2.08** | **0.038** | 92 | -1.29 | 0.197 |
| Fe, ppb | 128 | -0.25 | 0.8 | 107 | 0.72 | 0.47 |

**Permafrost/Absent** (« + » means permafrost < absent ; « - » means permafrost > absent)

| **Variable** | **June** | | | **August** | | |
| --- | --- | --- | --- | --- | --- | --- |
| **U** | **Z** | **p-level** | **U** | **Z** | **p-level** |
| рН | 40 | 0.31 | 0.757 | **6** | **3.4** | **0.0007** |
| DOC, ppm | 43 | 1.08 | 0.278 | **41** | **-2.24** | **0.025** |
| DIC, ppm | 27 | 1.75 | 0.08 | **5** | **3.45** | **0.0006** |
| P-PO4, µg·L-1 | 60 | 0.38 | 0.707 | 68 | -1.39 | 0.165 |
| Ptot, ppb | 45 | -0.05 | 0.959 | 93 | -0.56 | 0.575 |
| N-NO3-, µg·L-1 | 48 | -0.88 | 0.381 | **37** | **2.4** | **0.016** |
| N-NH4+, µg·L-1 | 49 | -0.83 | 0.404 | 71 | 0.63 | 0.526 |
| POC, mg·L-1 | 25 | -1.84 | 0.067 | 18 | -1.3 | 0.194 |
| Si, ppb | 34 | -0.62 | 0.536 | **49** | **2.02** | **0.044** |
| K, ppb | **3** | **2.22** | **0.027** | **10** | **3.3** | **0.001** |
| Ca, ppb | 16 | 1.55 | 0.122 | **3** | **3.53** | **0.0004** |
| Mn, ppb | 36 | -0.52 | 0.606 | 105 | 0.17 | 0.869 |
| Fe, ppb | 17 | -1.5 | 0.135 | 79 | -1.02 | 0.306 |

| **Table S4, continued.**  **June+August**, Continuous/Discontinuous  (« + » means continous < discontinuous; « - » means continuous > discontinuous)   | **Variable** | **U** | **Z** | **p-level** | | --- | --- | --- | --- | | рН | **33** | **-2.38** | **0.017** | | DOC, ppm | **40** | **-2.03** | **0.043** | | DIC, ppm | **31** | **-2.15** | **0.031** | | P-PO4, µg·L-1 | 74 | -0.16 | 0.87 | | Ptot, ppb | 76 | 0.055 | 0.956 | | N-NO3-, µg·L-1 | 59 | 0.99 | 0.324 | | N-NH4+, µg·L-1 | 62 | 0.82 | 0.412 | | POC, mg·L-1 | 66 | 0.6 | 0.547 | | Si, ppb | 63 | -0.77 | 0.443 | | K, ppb | 71 | -0.33 | 0.743 | | Ca, ppb | **26** | **-2.79** | **0.005** | | Mn, ppb | **39** | **-2.08** | **0.038** | | Fe, ppb | 70 | -0.38 | 0.702 | | **June+August**, Discontinuous/Sporadic  (« + » means discontinuous < sporadic; « - » means discontinuous > sporadic)   | **Variable** | **U** | **Z** | **p-level** | | --- | --- | --- | --- | | рН | 140 | -1.19 | 0.234 | | DOC, ppm | **95** | **2.8** | **0.005** | | DIC, ppm | 142 | 0.92 | 0.359 | | P-PO4, µg·L-1 | 175 | -0.73 | 0.468 | | Ptot, ppb | 197 | 0.16 | 0.876 | | N-NO3-, µg·L-1 | 143 | -1.56 | 0.12 | | N-NH4+, µg·L-1 | 174 | 0.75 | 0.452 | | POC, mg·L-1 | 131 | 1.87 | 0.062 | | Si, ppb | 145 | 1.5 | 0.133 | | K, ppb | 188.5 | 0.38 | 0.707 | | Ca, ppb | 160 | 1.11 | 0.265 | | Mn, ppb | **94** | **2.82** | **0.005** | | Fe, ppb | **120** | **2.15** | **0.032** | |
| --- | --- | --- | --- | --- | --- | --- | --- | --- | --- | --- | --- | --- | --- | --- | --- | --- | --- | --- | --- | --- | --- | --- | --- | --- | --- | --- | --- | --- | --- | --- | --- | --- | --- | --- | --- | --- | --- | --- | --- | --- | --- | --- | --- | --- | --- | --- | --- | --- | --- | --- | --- | --- | --- | --- | --- | --- | --- | --- | --- | --- | --- | --- | --- | --- | --- | --- | --- | --- | --- | --- | --- | --- | --- | --- | --- | --- | --- | --- | --- | --- | --- | --- | --- | --- | --- | --- | --- | --- | --- | --- | --- | --- | --- | --- | --- | --- | --- | --- | --- | --- | --- | --- | --- | --- | --- | --- | --- | --- | --- | --- | --- | --- | --- |
| **June+August,** Sporadic/Isolated  (« + » means sporadic < isolated; « - » means sporadic > isolated)   | **Variable** | **U** | **Z** | **p-level** | | --- | --- | --- | --- | | рН | 442 | -0.37 | 0.711 | | DOC, ppm | **243** | **3.57** | **0.0004** | | DIC, ppm | 511 | -0.15 | 0.885 | | P-PO4, µg·L-1 | 495 | -0.37 | 0.722 | | Ptot, ppb | 433 | -1.17 | 0.24 | | N-NO3-, µg·L-1 | 415 | 1.41 | 0.158 | | N-NH4+, µg·L-1 | 487 | 0.46 | 0.644 | | POC, mg·L-1 | 404 | -0.87 | 0.386 | | Si, ppb | **359** | **-2.15** | **0.032** | | K, ppb | 498 | 0.32 | 0.75 | | Ca, ppb | **331** | **2.52** | **0.012** | | Mn, ppb | **361** | **-2.12** | **0.034** | | Fe, ppb | 493 | 0.38 | 0.702 | | **June+August,** Permafrost/Absent  (« + » means permafrost < absent; « - » means permafrost > absent)   | **Variable** | **U** | **Z** | **p-level** | | --- | --- | --- | --- | | рН | **88** | **3.12** | **0.002** | | DOC, ppm | 262 | -1.23 | 0.218 | | DIC, ppm | **72** | **3.71** | **0.0002** | | P-PO4, µg·L-1 | 286 | -0.96 | 0.337 | | Ptot, ppb | 296 | -0.27 | 0.791 | | N-NO3-, µg·L-1 | 256 | 1.35 | 0.177 | | N-NH4+, µg·L-1 | 299 | 0.22 | 0.823 | | POC, mg·L-1 | 108 | -1.86 | 0.062 | | Si, ppb | 203 | 1.56 | 0.118 | | K, ppb | **26** | **4.02** | **0.00006** | | Ca, ppb | **47** | **3.74** | **0.0002** | | Mn, ppb | 300 | -0.21 | 0.834 | | Fe, ppb | 200 | -1.6 | 0.109 | |

**Table S5.** Impact of the watershed area (Sarea) on nutrient concentration assessed using non-parametric Spearman rang correlation coefficient (RS). Statistically significant correlations (at p < 0.05) are in red bold. If Rs is positive, the variable increases with increase of Sarea.

**June 2015**

Spearman correlation coefficient at р < 0.05

| **Variable** | **Watershed, km2** | | | | | | | |
| --- | --- | --- | --- | --- | --- | --- | --- | --- |
| **<100** | | **100-1000** | | **1000-10000** | | **>10000** | |
| **Rs** | **p-level** | **Rs** | **p-level** | **Rs** | **p-level** | **Rs** | **p-level** |
| рН | **0.51** | **0.021** | 0.06 | 0.82 | -0.37 | 0.468 | 0.2 | 0.704 |
| DOC, ppm | -0.07 | 0.782 | 0.07 | 0.81 | -0.49 | 0.329 | -0.49 | 0.329 |
| DIC, ppm | **0.73** | **0.0002** | 0.19 | 0.508 | -0.54 | 0.266 | 0.49 | 0.329 |
| PO4, µg·L-1 | **0.54** | **0.015** | 0.14 | 0.621 | -0.66 | 0.156 | 0.49 | 0.329 |
| Ptot, ppb | **0.68** | **0.001** | 0.27 | 0.334 | -0.66 | 0.156 | 0.09 | 0.872 |
| NO3, µg·L-1 | 0.14 | 0.569 | 0.1 | 0.713 | -0.43 | 0.397 | **-0.83** | **0.042** |
| NH4, µg·L-1 | 0.38 | 0.099 | 0.07 | 0.81 | -0.77 | 0.072 | -0.71 | 0.111 |
| POC, mg·L-1 | **0.55** | **0.012** | -0.09 | 0.742 | 0.37 | 0.468 | -0.77 | 0.072 |
| Si, ppb | 0.44 | 0.052 | 0.02 | 0.95 | 0.03 | 0.957 | -0.31 | 0.544 |
| K, ppb | 0.30 | 0.2 | 0.28 | 0.321 | -0.66 | 0.156 | 0.37 | 0.468 |
| Ca, ppb | **0.63** | **0.003** | 0.27 | 0.328 | -0.6 | 0.208 | 0.31 | 0.544 |
| Mn, ppb | **0.69** | **0.001** | 0.04 | 0.879 | 0.09 | 0.872 | -0.49 | 0.329 |
| Fe, ppb | 0.34 | 0.141 | -0.004 | 0.99 | -0.49 | 0.329 | -0.37 | 0.468 |
| Zn, ppb | **-0.45** | **0.046** | -0.08 | 0.791 | 0.09 | 0.872 | 0.09 | 0.872 |

**August 2015**

Spearman correlation coefficient at р < 0.05

| **Variable** | **Watershed, km2** | | | | | | | |
| --- | --- | --- | --- | --- | --- | --- | --- | --- |
| **<100** | | **100-1000** | | **1000-10000** | | **>10000** | |
| **Rs** | **p-level** | **Rs** | **p-level** | **Rs** | **p-level** | **Rs** | **p-level** |
| рН | **0.59** | **0.006** | 0.31 | 0.254 | -0.8 | 0.104 | 0.6 | 0.208 |
| DOC, ppm | -0.04 | 0.87 | -0.04 | 0.881 | -0.66 | 0.156 | -0.77 | 0.072 |
| DIC, ppm | **0.77** | **0.0002** | 0.35 | 0.174 | -0.6 | 0.208 | 0.71 | 0.111 |
| PO4, µg·L-1 | **0.56** | **0.01** | 0.1 | 0.701 | -0.6 | 0.208 | 0.03 | 0.957 |
| Ptot, ppb | **0.68** | **0.001** | -0.09 | 0.722 | -0.66 | 0.156 | 0.09 | 0.872 |
| NO3, µg·L-1 | 0.22 | 0.363 | -0.01 | 0.978 | -0.66 | 0.156 | 0.37 | 0.468 |
| NH4, µg·L-1 | 0.15 | 0.514 | -0.42 | 0.094 | -0.54 | 0.266 | 0.2 | 0.747 |
| POC, mg·L-1 | 0.24 | 0.318 | -0.49 | 0.055 | -0.4 | 0.6 | -0.5 | 0.667 |
| Si, ppb | 0.41 | 0.071 | 0.17 | 0.523 | 0.43 | 0.397 | 0.31 | 0.544 |
| K, ppb | **0.62** | **0.003** | 0.41 | 0.098 | -0.6 | 0.208 | 0.54 | 0.266 |
| Ca, ppb | **0.67** | **0.001** | 0.36 | 0.152 | -0.6 | 0.208 | 0.66 | 0.156 |
| Mn, ppb | **0.7** | **0.001** | 0.04 | 0.889 | **-0.94** | **0.005** | -0.66 | 0.156 |
| Fe, ppb | **0.51** | **0.023** | -0.31 | 0.232 | -0.49 | 0.329 | -0.26 | 0.623 |
| Zn, ppb | -0.05 | 0.845 | -0.23 | 0.384 | -0.09 | 0.872 | -0.03 | 0.957 |

**Figure S1-A**. Tree diagram of all seasons, all rivers. HCA diagram for small and medium rivers (< 10,000 km² watershed area).

**Figure S1-B**. HCA diagram for most significant linkages between components, visible for small and medium rivers (< 10,000 km² watershed area) located north of 61° N, sampled in August.

|  |  |
| --- | --- |
|  |  |
|  |  |

**Figure S2.** DOC, Si, K, Ca, Mn and Fe concentrations relationships with permafrost coverage of the watershed during June (open circles) and August (closed diamonds) in all rivers of the WSL sampled in this work. The R value is Pearson correlation coefficient for the full dataset. The solid line is for the main trend and the dashed lines are significant at p < 0.05.

|  |  |
| --- | --- |
|  |  |
|  |  |

**Figure S2, continued.** DIC, PO4, Ptot, NO3, NH4 and POC concentrations relationships with permafrost coverage of the watershed during June (open circles) and August (closed diamonds) in all rivers of the WSL sampled in this work. The R value is Pearson correlation coefficient for the full dataset. The solid line is for the main trend and the dashed lines are significant at p < 0.05.
